# Supplementary material for: Focused HLA analysis in Caucasians with myositis identifies significant associations with autoantibody subgroups
Source: PubMed Central journal article supplement — Ann Rheum Dis. 2019 May 28;78(7):996–1002. doi: 10.1136/annrheumdis-2019-215046 (PMC6585280; doi:10.1136/annrheumdis-2019-215046), 2019-05-28
Supplement: annrheumdis-2019-215046supp001.pdf [file annrheumdis-2019-215046supp001.pdf]

**Supplementary Table 1. Breakdown of cohort by country of origin and clinical diagnosis.**

| <b>Origin</b>         | <b>DM</b>  | <b>IBM</b> | <b>JDM</b> | <b>JPM</b> | <b>PM</b>  | <b>Necrotizing</b> | <b>ASS<sup>1</sup></b> | <b>Total</b> |
|-----------------------|------------|------------|------------|------------|------------|--------------------|------------------------|--------------|
| <b>Australia</b>      | 19         | 44         | 0          | 0          | 56         | 7                  | 0                      | <b>126</b>   |
| <b>Belgium</b>        | 2          | 6          | 0          | 0          | 4          | 15                 | 0                      | <b>27</b>    |
| <b>Czech Republic</b> | 119        | 2          | 10         | 0          | 102        | 6                  | 0                      | <b>239</b>   |
| <b>Denmark</b>        | 0          | 0          | 46         | 7          | 0          | 0                  | 0                      | <b>53</b>    |
| <b>France</b>         | 10         | 19         | 0          | 0          | 6          | 10                 | 1                      | <b>46</b>    |
| <b>Hungary</b>        | 60         | 2          | 18         | 1          | 127        | 2                  | 0                      | <b>210</b>   |
| <b>Italy</b>          | 15         | 2          | 0          | 0          | 15         | 0                  | 4                      | <b>36</b>    |
| <b>Netherlands</b>    | 13         | 9          | 0          | 0          | 16         | 0                  | 0                      | <b>38</b>    |
| <b>Norway</b>         | 32         | 1          | 5          | 0          | 25         | 0                  | 0                      | <b>63</b>    |
| <b>Switzerland</b>    | 1          | 0          | 0          | 0          | 2          | 0                  | 0                      | <b>3</b>     |
| <b>Sweden</b>         | 89         | 31         | 5          | 0          | 143        | 0                  | 0                      | <b>268</b>   |
| <b>Spain</b>          | 37         | 8          | 1          | 0          | 25         | 0                  | 0                      | <b>71</b>    |
| <b>United Kingdom</b> | 289        | 128        | 193        | 4          | 367        | 8                  | 6                      | <b>995</b>   |
| <b>United States</b>  | 146        | 0          | 230        | 0          | 31         | 0                  | 0                      | <b>407</b>   |
| <b>Total</b>          | <b>832</b> | <b>252</b> | <b>508</b> | <b>12</b>  | <b>919</b> | <b>48</b>          | <b>11</b>              | <b>2582</b>  |

<sup>1</sup> Patients classified with antisynthetase syndrome (ASS) where clinical data was not available to stratify by Bohan and Peter classification criteria

**Supplementary Table 2 – Method of antibody detection for each positive antibody.**

| Autoantibody | Immunoprecipitation |                  |                    | Lineblot                        |                             | ELISA | Other/Unknown | Total positive | Number of patients tested <sup>6</sup> | Frequency in cohort <sup>7</sup> |
|--------------|---------------------|------------------|--------------------|---------------------------------|-----------------------------|-------|---------------|----------------|----------------------------------------|----------------------------------|
|              | UK <sup>1</sup>     | USA <sup>2</sup> | Japan <sup>3</sup> | EUROIMMUN Lineblot <sup>4</sup> | Other lineblot <sup>5</sup> |       |               |                |                                        |                                  |
| Jo-1         | 202                 | 49               | 21                 | 51                              | 4                           | 0     | 5             | 332            | 2,384                                  | 13.9%                            |
| TIF          | 73                  | 105              | 10                 | 5                               | 0                           | 1     | 3             | 197            | 2,053                                  | 9.6%                             |
| PM/Scl       | 98                  | 7                | 11                 | 19                              | 1                           | 0     | 0             | 136            | 2,340                                  | 5.8%                             |
| Mi2          | 71                  | 13               | 5                  | 9                               | 4                           | 0     | 2             | 104            | 2,340                                  | 4.4%                             |
| NXP2         | 53                  | 37               | 1                  | 1                               | 0                           | 1     | 0             | 93             | 1,862                                  | 5.0%                             |
| cN1A         | 0                   | 0                | 0                  | 0                               | 0                           | 46    | 0             | 46             | 302                                    | 15.2%                            |
| SRP          | 29                  | 1                | 4                  | 8                               | 3                           | 0     | 0             | 45             | 2,279                                  | 2.0%                             |
| HMGCR        | 0                   | 0                | 0                  | 0                               | 0                           | 45    | 7             | 52             | 1,394                                  | 3.7%                             |
| MDA5         | 27                  | 5                | 3                  | 0                               | 0                           | 0     | 0             | 35             | 2,076                                  | 1.7%                             |
| SAE          | 28                  | 0                | 2                  | 1                               | 0                           | 0     | 0             | 31             | 1,915                                  | 1.6%                             |
| PL7          | 13                  | 3                | 1                  | 5                               | 1                           | 0     | 0             | 23             | 2,384                                  | 1.0%                             |
| PL12         | 5                   | 2                | 0                  | 3                               | 1                           | 0     | 0             | 11             | 2,384                                  | 0.5%                             |

1, Immunoprecipitation conducted by Department of Pharmacy and Pharmacology University of Bath, UK. Includes samples from non-UK cohorts.

2, Immunoprecipitation and confirmation by immunoblotting conducted by Arthritis & Clinical Immunology Research Program, Oklahoma Medical Research Foundation, OK, USA

3, Immunoprecipitation conducted by Department of Rheumatology and Clinical Immunology, Kyoto University, JP.

4, EUROIMMUN EUROLINE ANA Profile 3, EUROLINE Autoimmune Inflammatory Myopathies 16 Ag (Luebeck, Germany)

5, D-tek PMS8D, PMS12D, SYN10D, MYO7D (Mons, Belgium). ORGENTEC Diagnostika Myositis Plus ORG 760 (Mainz, Germany)

6, Note distribution of testing was not random. For example, anti-cN1A autoantibodies were tested for in a selected cohort of IBM patients.

7, Percentage frequency of antibody present in those tested.

**Supplementary Table 3 - Concordance between imputed HLA alleles and next generation sequencing HLA typing for 162 individuals**

| <b>HLA Locus</b> | <b>2-digit imputation Accuracy</b> | <b>4-digit imputation accuracy</b> |
|------------------|------------------------------------|------------------------------------|
| <b>HLA-A</b>     | 99.70%                             | 98.80%                             |
| <b>HLA-B</b>     | 99.10%                             | 97.50%                             |
| <b>HLA-C</b>     | 100%                               | 99.38%                             |
| <b>HLA-DPA1</b>  | 99.70%                             | 99.40%                             |
| <b>HLA-DPB1</b>  | 98.50%                             | 98.50%                             |
| <b>HLA-DQA1</b>  | 100%                               | 100%                               |
| <b>HLA-DRB1</b>  | 98.4%                              | 96.60%                             |
| <b>HLA-DQB1</b>  | 99.69%                             | 99.38%                             |

**Supplementary Table 4 – Frequency of individuals who have at least one copy of HLA-DRB1\*03:01, in anti-aminoacyl-tRNA synthetase positive subgroups**

| <b>Autoantibody</b> | <b>Number</b> | <b>Frequency of HLA-DRB1*03:01</b> |
|---------------------|---------------|------------------------------------|
| <b>Anti-Jo-1</b>    | 332           | 79.2%                              |
| <b>Anti-PL7</b>     | 23            | 30.4%                              |
| <b>Anti-PL12</b>    | 11            | 81.8%                              |
| <b>Anti-OJ</b>      | 8             | 37.5%                              |
| <b>Anti-EJ</b>      | 4             | 25.0%                              |
| <b>Anti-ZO</b>      | 2             | 100%                               |
| <b>Anti-KS</b>      | 1             | 0.00                               |
| <b>Controls</b>     | 1,328         | 23.0%                              |

**Supplementary Table 5 – Raw phased 4-digit HLA alleles for patients with anti-PL7 autoantibodies**

|              | Haplotype 1 |      |      |      |      |      |      |      | Haplotype 2 |      |      |      |      |      |      |      |
|--------------|-------------|------|------|------|------|------|------|------|-------------|------|------|------|------|------|------|------|
|              | A           | C    | B    | DRB1 | DQA1 | DQB1 | DPA1 | DPB1 | A           | C    | B    | DRB1 | DQA1 | DQB1 | DPA1 | DPB1 |
| <b>AUS 1</b> | 2402        | 0702 | 0702 | 0701 | 0201 | 0303 | 0201 | 1301 | 2601        | 0102 | 2705 | 0401 | 0301 | 0302 | 0103 | 0401 |
| <b>AUS 2</b> | 0301        | 0401 | 3501 | 0101 | 0101 | 0501 | 0103 | 0401 | 0101        | 0701 | 0801 | 0301 | 0501 | 0201 | 0103 | 0301 |
| <b>CZE 1</b> | 1101        | 0202 | 2705 | 0404 | 0301 | 0302 | 0201 | 1701 | 0201        | 0602 | 1302 | 0701 | 0201 | 0202 | 0201 | 1701 |
| <b>CZE 2</b> | 0201        | 0602 | 5701 | 1101 | 0501 | 0301 | 0103 | 0401 | 0201        | 0701 | 0801 | 0301 | 0501 | 0201 | 0201 | 0101 |
| <b>CZE 3</b> | 2402        | 0303 | 1501 | 1301 | 0103 | 0603 | 0103 | 0401 | 0101        | 0701 | 0801 | 0301 | 0501 | 0201 | 0103 | 0401 |
| <b>HUN 1</b> | 0101        | 0701 | 0801 | 0301 | 0501 | 0201 | 0103 | 0401 | 0101        | 0701 | 0801 | 0301 | 0501 | 0201 | 0201 | 0101 |
| <b>NOR 1</b> | 0301        | 0304 | 4001 | 0404 | 0301 | 0302 | 0103 | 0401 | 2402        | 0304 | 0702 | 1501 | 0102 | 0602 | 0103 | 0201 |
| <b>NOR 2</b> | 2902        | 0602 | 4501 | 0401 | 0301 | 0301 | 0103 | 0402 | 0201        | 0501 | 1801 | 0401 | 0301 | 0302 | 0103 | 0401 |
| <b>GBR 1</b> | 0101        | 0501 | 4402 | 1501 | 0102 | 0602 | 0103 | 0401 | 3201        | 0702 | 3906 | 0804 | 0401 | 0402 | 0103 | 0401 |
| <b>GBR 2</b> | 2501        | 1203 | 1801 | 1501 | 0102 | 0602 | 0103 | 0401 | 3201        | 0102 | 2705 | 0801 | 0401 | 0402 | 0103 | 0401 |
| <b>GBR 3</b> | 0206        | 0303 | 2705 | 0401 | 0301 | 0302 | 0103 | 0401 | 0201        | 0702 | 0702 | 1501 | 0102 | 0602 | 0103 | 0201 |
| <b>GBR 4</b> | 3101        | 0401 | 3501 | 1501 | 0102 | 0602 | 0103 | 0401 | 2402        | 0303 | 1501 | 1301 | 0103 | 0603 | 0103 | 0401 |
| <b>GBR 5</b> | 0201        | 0501 | 4402 | 1501 | 0102 | 0602 | 0202 | 0501 | 0101        | 0701 | 5801 | 1302 | 0102 | 0609 | 0103 | 0401 |
| <b>GBR 6</b> | 0206        | 0202 | 2703 | 0101 | 0101 | 0501 | 0103 | 0401 | 2402        | 0801 | 4801 | 0403 | 0301 | 0302 | 0103 | 0201 |
| <b>GBR 7</b> | 0201        | 0702 | 0702 | 0404 | 0301 | 0302 | 0103 | 0401 | 2402        | 0702 | 0702 | 1501 | 0102 | 0602 | 0103 | 0401 |
| <b>GBR 8</b> | 0301        | 0401 | 3501 | 0101 | 0101 | 0501 | 0103 | 0401 | 0301        | 0701 | 1801 | 0404 | 0301 | 0302 | 0201 | 0901 |
| <b>GBR 9</b> | 0101        | 0701 | 0801 | 0401 | 0301 | 0301 | 0103 | 0401 | 3101        | 0304 | 4001 | 0404 | 0301 | 0302 | 0103 | 0601 |
| <b>SWE 1</b> | 0201        | 0401 | 0702 | 1401 | 0101 | 0503 | 0103 | 0201 | 0101        | 0701 | 0801 | 0301 | 0501 | 0201 | 0103 | 0401 |
| <b>SWE 2</b> | 0101        | 0701 | 0801 | 0301 | 0501 | 0201 | 0103 | 0401 | 3101        | 0701 | 1801 | 1501 | 0102 | 0602 | 0103 | 0401 |
| <b>ESP 1</b> | 2402        | 0701 | 0801 | 0301 | 0501 | 0201 | 0103 | 0401 | 0301        | 1502 | 5101 | 1401 | 0101 | 0503 | 0103 | 0401 |
| <b>USA 1</b> | 0201        | 0501 | 4402 | 0101 | 0101 | 0501 | 0103 | 0401 | 0201        | 0501 | 4402 | 0401 | 0301 | 0301 | 0103 | 0401 |
| <b>USA 2</b> | 6802        | 0401 | 5301 | 0102 | 0101 | 0501 | 0201 | 1401 | 0101        | 0701 | 0801 | 0901 | 0301 | 0303 | 0103 | 0401 |
| <b>USA 3</b> | 3201        | 0401 | 3501 | 0101 | 0101 | 0501 | 0201 | 1001 | 0201        | 1505 | 7301 | 0405 | 0301 | 0201 | 0103 | 0301 |

**Supplementary Table 6 - Raw phased 4-digit HLA alleles for patients with anti-PL12 autoantibodies**

|              | Haplotype 1 |      |      |      |      |      |      |      | Haplotype 2 |      |      |      |      |      |      |      |
|--------------|-------------|------|------|------|------|------|------|------|-------------|------|------|------|------|------|------|------|
|              | A           | C    | B    | DRB1 | DQA1 | DQB1 | DPA1 | DPB1 | A           | C    | B    | DRB1 | DQA1 | DQB1 | DPA1 | DPB1 |
| <b>ITA 1</b> | 0301        | 0501 | 1801 | 0301 | 0501 | 0201 | 0103 | 0301 | 3002        | 0401 | 3502 | 1104 | 0501 | 0301 | 0103 | 0402 |
| <b>ITA 2</b> | 0201        | 1203 | 3901 | 1601 | 0102 | 0502 | 0103 | 0401 | 0201        | 0202 | 2705 | 1303 | 0501 | 0301 | 0103 | 0301 |
| <b>GBR 1</b> | 0201        | 0702 | 0702 | 1101 | 0501 | 0301 | 0103 | 0401 | 3002        | 0501 | 1801 | 0301 | 0501 | 0201 | 0103 | 0402 |
| <b>GBR 2</b> | 0301        | 0702 | 0702 | 0801 | 0401 | 0402 | 0103 | 0301 | 0301        | 0702 | 0702 | 1101 | 0501 | 0301 | 0103 | 0201 |
| <b>GBR 3</b> | 0101        | 0701 | 0801 | 0301 | 0501 | 0201 | 0201 | 0101 | 2402        | 0702 | 3906 | 0404 | 0301 | 0302 | 0103 | 0402 |
| <b>GBR 4</b> | 0301        | 0701 | 0801 | 0301 | 0501 | 0201 | 0103 | 0402 | 2402        | 0102 | 5601 | 1302 | 0102 | 0604 | 0103 | 0401 |
| <b>GBR 5</b> | 0101        | 0702 | 0702 | 1301 | 0103 | 0603 | 0103 | 0401 | 0101        | 0701 | 0801 | 0301 | 0501 | 0201 | 0103 | 0401 |
| <b>HUN 1</b> | 0101        | 0701 | 0801 | 0301 | 0501 | 0201 | 0103 | 0402 | 0201        | 0704 | 4402 | 1601 | 0102 | 0502 | 0103 | 0401 |
| <b>ESP 1</b> | 6801        | 0501 | 1801 | 0301 | 0501 | 0201 | 0103 | 0202 | 0301        | 0401 | 3501 | 0403 | 0301 | 0302 | 0103 | 0201 |
| <b>USA 1</b> | 0201        | 0701 | 0801 | 0301 | 0501 | 0201 | 0201 | 0101 | 1101        | 0401 | 3501 | 1401 | 0101 | 0503 | 0103 | 0401 |
| <b>USA 2</b> | 0101        | 0701 | 0801 | 0301 | 0501 | 0201 | 0201 | 0101 | 0201        | 0401 | 3508 | 1201 | 0501 | 0301 | 0103 | 0401 |

**Supplementary Table 7 - Raw phased 4-digit HLA alleles for patients with anti-OJ autoantibodies**

|              | Haplotype 1 |      |      |      |      |      |      |      | Haplotype 2 |      |      |      |      |      |      |      |
|--------------|-------------|------|------|------|------|------|------|------|-------------|------|------|------|------|------|------|------|
|              | A           | C    | B    | DRB1 | DQA1 | DQB1 | DPA1 | DPB1 | A           | C    | B    | DRB1 | DQA1 | DQB1 | DPA1 | DPB1 |
| <b>GBR 1</b> | 0101        | 0701 | 0801 | 0301 | 0501 | 0201 | 0103 | 0401 | 3101        | 0501 | 4402 | 0401 | 0301 | 0301 | 0103 | 0402 |
| <b>GBR 2</b> | 0201        | 0702 | 0702 | 1101 | 0501 | 0301 | 0103 | 0401 | 2501        | 1203 | 1801 | 1501 | 0102 | 0602 | 0201 | 1401 |
| <b>GBR 3</b> | 0201        | 0702 | 0702 | 0701 | 0201 | 0201 | 0103 | 0401 | 0301        | 0702 | 0702 | 1501 | 0102 | 0602 | 0103 | 0401 |
| <b>GBR 4</b> | 0201        | 1601 | 5101 | 1102 | 0501 | 0301 | 0103 | 0401 | 3101        | 0401 | 3502 | 0404 | 0301 | 0302 | 0103 | 2301 |
| <b>GBR 5</b> | 2301        | 0401 | 4403 | 0404 | 0301 | 0302 | 0103 | 0301 | 0101        | 0401 | 3501 | 1101 | 0501 | 0301 | 0103 | 0401 |
| <b>GBR 6</b> | 0201        | 0304 | 1501 | 0403 | 0301 | 0302 | 0103 | 0401 | 0201        | 0501 | 4402 | 0401 | 0301 | 0301 | 0103 | 0401 |
| <b>SWE 1</b> | 0101        | 0701 | 0801 | 0301 | 0501 | 0201 | 0103 | 0401 | 0201        | 0304 | 4001 | 0801 | 0401 | 0402 | 0103 | 0301 |
| <b>USA 1</b> | 0201        | 0303 | 5501 | 1401 | 0101 | 0503 | 0201 | 1001 | 0101        | 0701 | 0801 | 0301 | 0501 | 0201 | 0103 | 0301 |

**Supplementary Table 8 - Raw phased 4-digit HLA alleles for patients with anti-EJ autoantibodies**

|              | Haplotype 1 |      |      |      |      |      |      |      | Haplotype 2 |      |      |      |      |      |      |      |
|--------------|-------------|------|------|------|------|------|------|------|-------------|------|------|------|------|------|------|------|
|              | A           | C    | B    | DRB1 | DQA1 | DQB1 | DPA1 | DPB1 | A           | C    | B    | DRB1 | DQA1 | DQB1 | DPA1 | DPB1 |
| <b>BEL 1</b> | 2402        | 1502 | 5101 | 1101 | 0501 | 0301 | 0103 | 0401 | 6801        | 1203 | 3801 | 0301 | 0501 | 0201 | 0103 | 0401 |
| <b>CZE 1</b> | 0201        | 0102 | 1501 | 1301 | 0103 | 0603 | 0202 | 1901 | 6601        | 0702 | 0702 | 1501 | 0102 | 0602 | 0103 | 0402 |
| <b>SWE 1</b> | 2402        | 0701 | 1801 | 1501 | 0102 | 0602 | 0103 | 0401 | 3101        | 0303 | 1501 | 0804 | 0401 | 0402 | 0103 | 0401 |
| <b>USA 1</b> | 0205        | 0602 | 5001 | 0701 | 0201 | 0202 | 0103 | 0301 | 0201        | 0501 | 4402 | 0401 | 0301 | 0302 | 0103 | 0402 |

**Supplementary Table 9 - Raw phased 4-digit HLA alleles for patients with anti-ZO autoantibodies**

|              | Haplotype 1 |      |      |      |      |      |      |      | Haplotype 2 |      |      |      |      |      |      |      |
|--------------|-------------|------|------|------|------|------|------|------|-------------|------|------|------|------|------|------|------|
|              | A           | C    | B    | DRB1 | DQA1 | DQB1 | DPA1 | DPB1 | A           | C    | B    | DRB1 | DQA1 | DQB1 | DPA1 | DPB1 |
| <b>GBR 1</b> | 0101        | 0701 | 0801 | 1501 | 0102 | 0602 | 0103 | 0401 | 0201        | 0802 | 1402 | 0301 | 0501 | 0201 | 0201 | 1401 |
| <b>GBR 2</b> | 0201        | 0701 | 0801 | 0301 | 0501 | 0201 | 0103 | 0201 | 0101        | 0701 | 0801 | 0301 | 0501 | 0201 | 0103 | 0401 |

**Supplementary Table 10 - Raw phased 4-digit HLA alleles for patients with anti-KS autoantibodies**

|              | Haplotype 1 |      |      |      |      |      |      |      | Haplotype 2 |      |      |      |      |      |      |      |
|--------------|-------------|------|------|------|------|------|------|------|-------------|------|------|------|------|------|------|------|
|              | A           | C    | B    | DRB1 | DQA1 | DQB1 | DPA1 | DPB1 | A           | C    | B    | DRB1 | DQA1 | DQB1 | DPA1 | DPB1 |
| <b>GBR 1</b> | 2501        | 0701 | 0801 | 1401 | 0101 | 0503 | 0201 | 1001 | 0101        | 0701 | 0801 | 1301 | 0103 | 0603 | 0202 | 0501 |

**Supplementary Table 11 – Frequencies of alleles in adult- and juvenile-onset IIM patients for anti-Jo-1, anti-PM/Scl, anti-Mi2 and anti-cN1A autoantibodies**

| <b>Autoantibody</b> | <b>Allele</b>  | <b>Freq in adults, %</b> | <b>Freq in juveniles, %</b> | <b>Freq in controls, %</b> |
|---------------------|----------------|--------------------------|-----------------------------|----------------------------|
| <b>Jo-1</b>         | HLA-B*8:01     | 243/325 (74.8%)          | 7/7 (100%)                  | 305/1,328 (23.0%)          |
| <b>PM/Scl</b>       | HLA-DQB1*02:01 | 116/120 (96.6%)          | 14/16 (87.5%)               | 133/548 (24.3%)            |
| <b>Mi-2</b>         | HLA-DRB1*07:01 | 59/87 (67.8%)            | 7/17 (41.2%)                | 96/416 (23.1%)             |
| <b>cN1A</b>         | HLA-DRB1*03:01 | 35/46 (76.1%)            | 12/18 (66.7%)               | 61/256 (23.8%)             |

Frequencies as a percentage of individuals heterozygous or homozygous for the risk allele from the combined analysis, stratified by adult and juvenile onset disease.



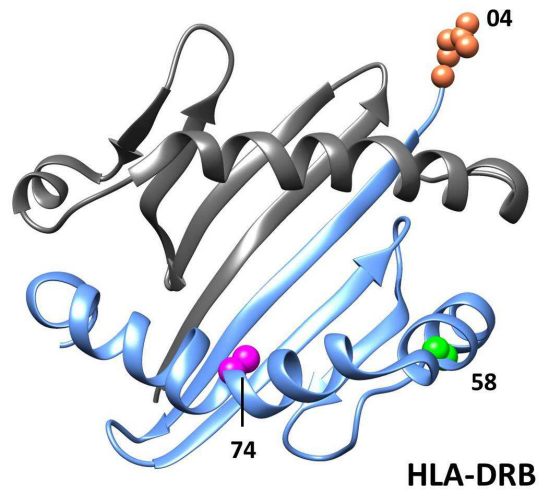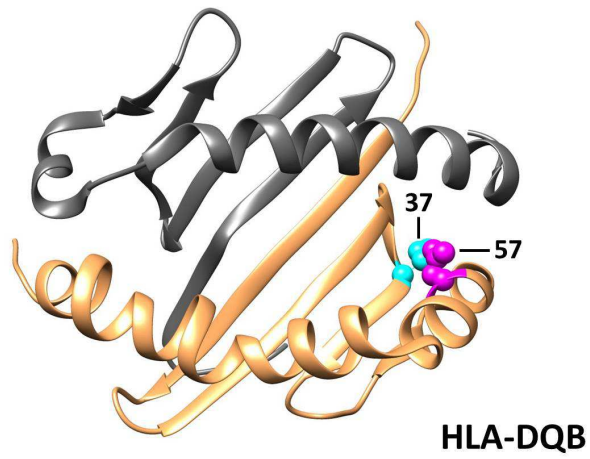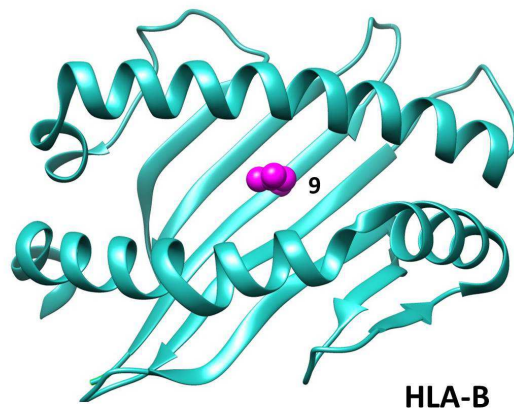

**Supplementary Figure 1. The location of associated amino acid positions within the 3D structure of HLA molecules.** Protein structures of the HLA peptide binding groove are shown for HLA-DRB (blue) and HLA-DQB (orange) and HLA-B (turquoise). The positions of associated amino acid positions for different IIM autoantibodies are labelled.

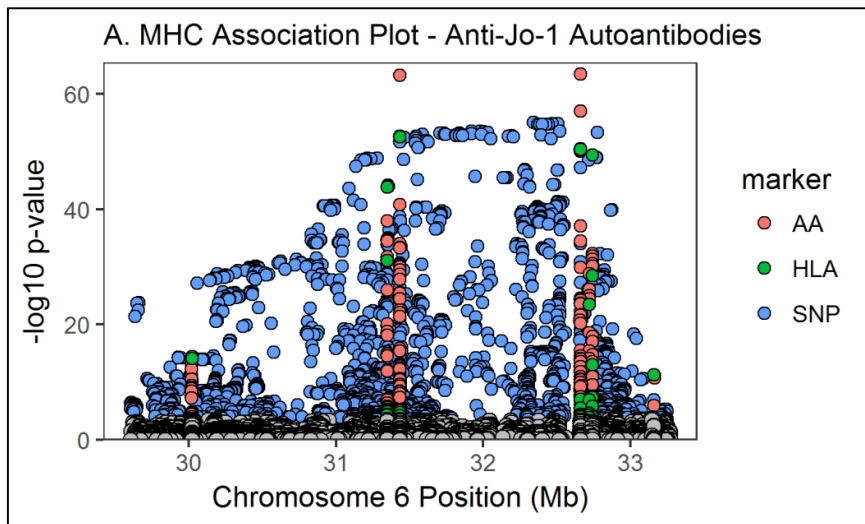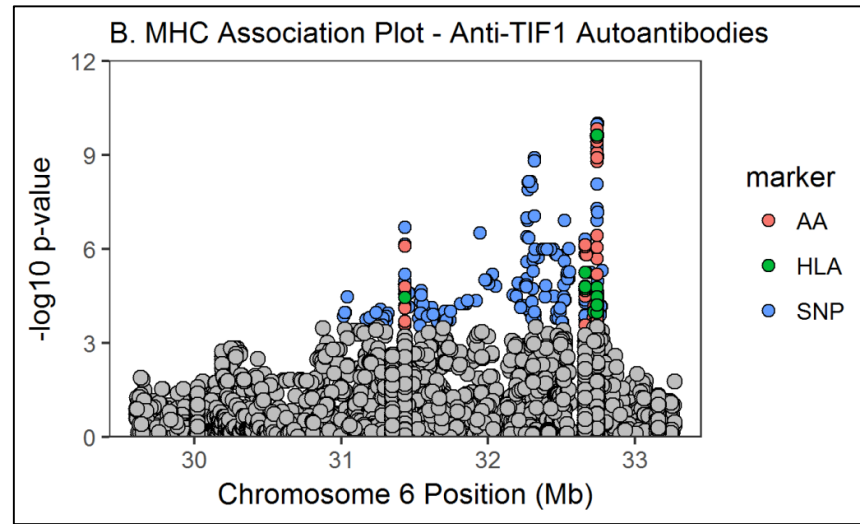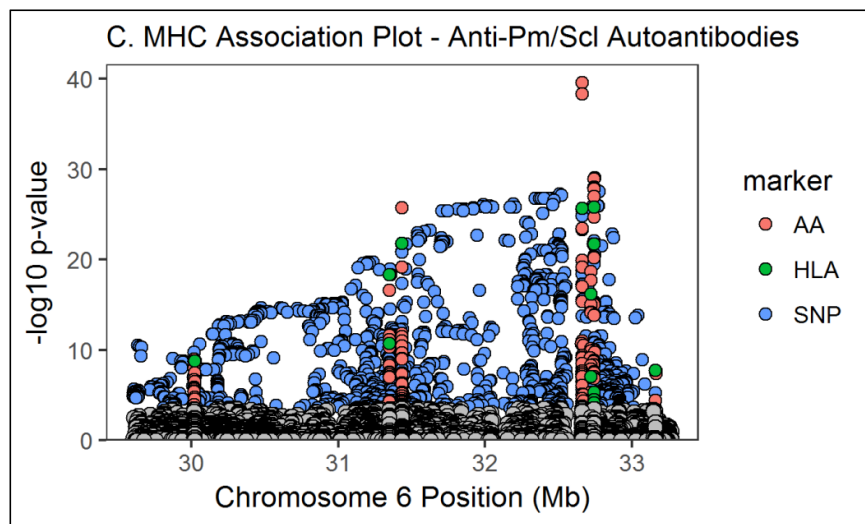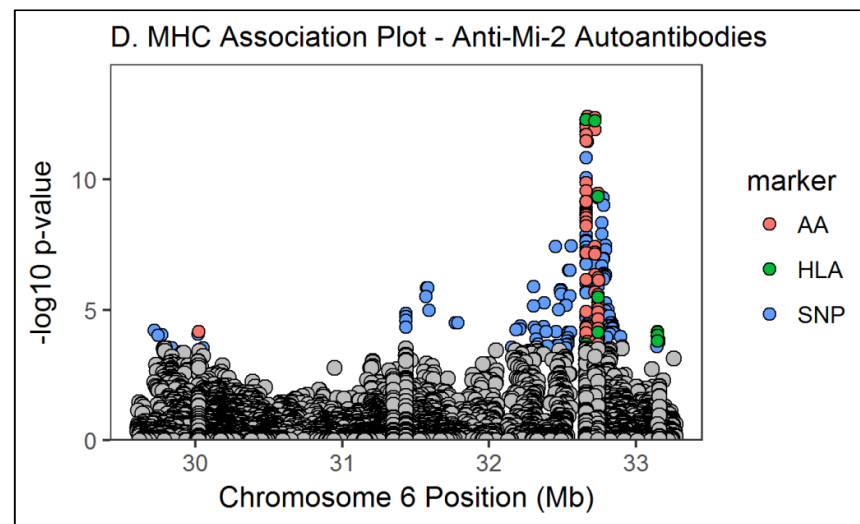

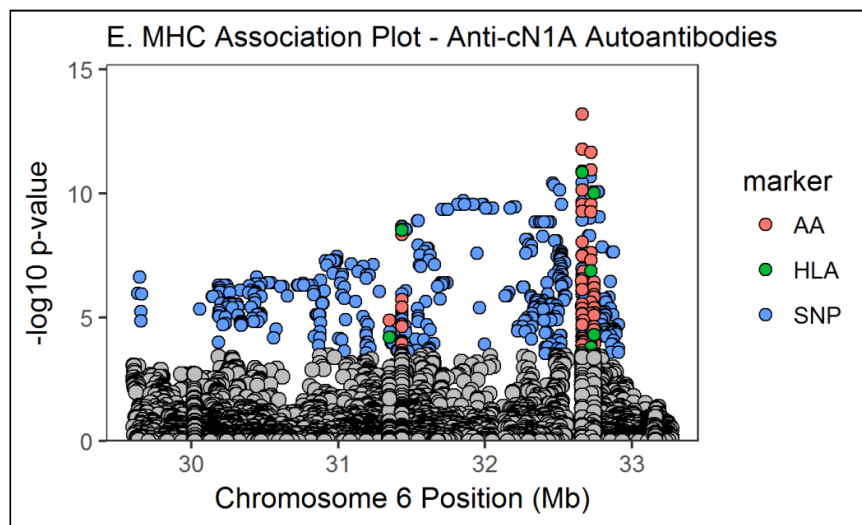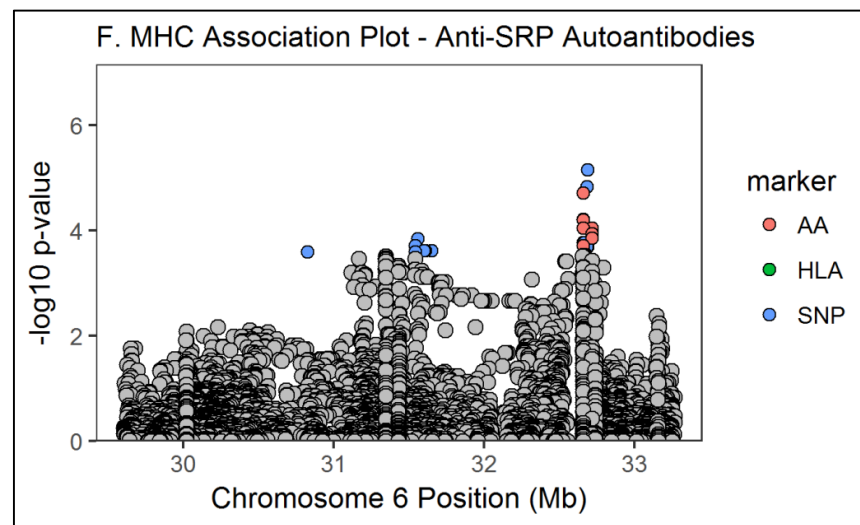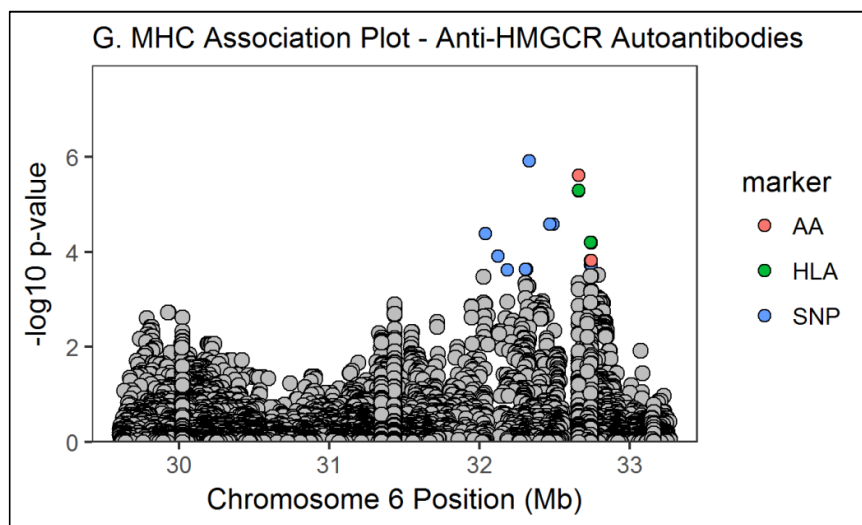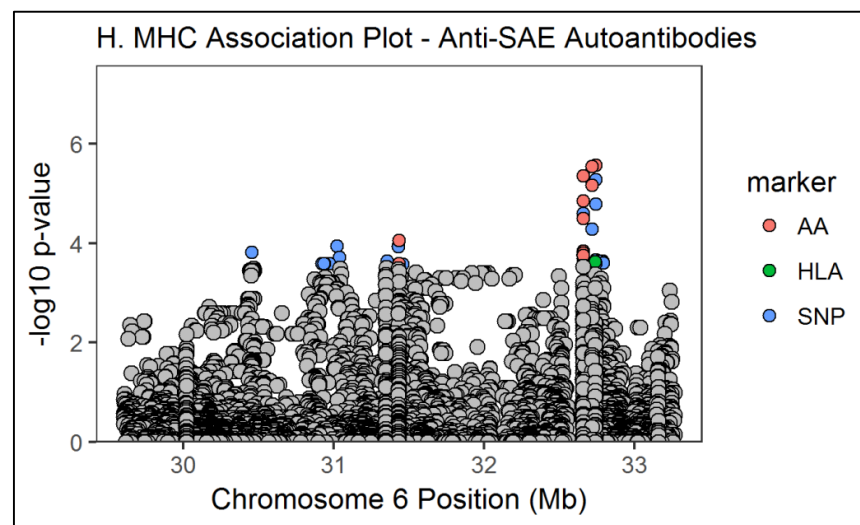

**Supplementary Figures 2A-H. Regional association plots for autoantibodies with significant associations.** Amino acids (AA), classical HLA alleles and SNPs coloured as red, green and blue markers respectively. Non-significant variants are coloured grey ( $p > 2.9 \times 10^{-5}$ ). Location of HLA and amino acids plotted by the coordinates of their respective genes.

## 1 **Supplementary Methods**

### 2 **Autoantibody Testing**

3 Myositis autoantibodies were detected using immunoprecipitation (IP), line-blot, or ELISA, as  
4 detailed in Supplementary Table 2.

5 MSAs (defined as: Jo-1, PL12, PL7, EJ, KS, OJ, Zo, Mi-2, SRP, TIF1, SAE, MDA5, NXP2 and HMGCR) are  
6 generally mutually exclusive [15]. 12 individuals with multiple MSAs were removed from the analysis  
7 to ensure homogenous subgroups. Anti-Ro was not analysed due to insufficient data on the subunit  
8 detected across different cohorts.

9 In the UK, immunoprecipitation (IP) was conducted in the Department of Pharmacy and  
10 Pharmacology, University of Bath, UK as described previously [1]. ELISA was used to confirm anti-  
11 TIF1 in those with a 155kDa band and to distinguish anti-MDA5 and anti-NXP2 in those with 140kDa  
12 bands. In the USA, IP and confirmatory immunoblotting as appropriate, was conducted by Arthritis &  
13 Clinical Immunology Research Program, Oklahoma Medical Research Foundation, OK, USA [2]. TIF1,  
14 NXP2, and MDA5 were confirmed by IP-blotting. In Japan, IP was conducted in the Department of  
15 Rheumatology and Clinical Immunology, Kyoto University, JP [3]. ELISAs were used to discriminate  
16 other 140kDa bands.

17 The most common commercially available lineblots used were EUROLINE Myositis Lineblots  
18 (Euroimmun, Lübeck, Germany). This consists of a membrane strip with 11 autoantigen assays for  
19 the EUROLINE Myositis Profile 3 Lineblot (Ro-52, OJ, EJ, PL-12, PL-7, SRP, Jo-1, PM/Scl75, PM/Scl100,  
20 Ku, Mi-2) or 16 autoantigen assays the EUROLINE Myositis 16A lineblot (Mi-2  $\alpha$ , Mi-2  $\beta$ , TIF1g,  
21 MDA5, NXP2, SAE1, Ku, PM/Scl100, PM/Scl75, Jo-1, SRP, PL-7, PL-12, EJ, OJ, Ro-52). For EUROLINE  
22 Immunoblots that include both PM/Scl100 and PM/Scl75 subunits, patients were only considered  
23 anti-PM/Scl positive if positive for PM/Scl100 due to suspected false positives with the PM/Scl75  
24 assay [4]. Due to known sensitivity issues with the Mi-2  $\alpha$  and Mi-2  $\beta$  assays, a more stringent cut-off  
25 was required for positivity for this autoantibody [4].

26 A smaller number of samples were tested using other commercially available lineblots, such as D-tek  
27 PMS8D, PMS12D, SYN10D, MYO7D (Mons, Belgium) and ORGENTEC Diagnostika Myositis Plus ORG  
28 760 (Mainz, Germany).

29 Anti-cN1A was detected in the USA by immunoblot in the Muscle Disease Unit, National Institutes of  
30 Health (NIH), MD, USA. Patient sera was used to immunoblot lysates from HeLa cells transfected  
31 with full-length cN1A vs. non-transfected HeLa cells [5]. Anti-cN1A was detected in the Netherlands

1 by ELISA in the Department of Biomolecular Chemistry, University of Nijmegen, NL, using a method  
2 described previously [6].

3 Anti-HMGCR was detected in the USA by ELISA followed by IP at the Muscle Disease Unit, National  
4 Institutes of Health (NIH), MD, USA [7], in the UK by ELISA in the Department of Pharmacy and  
5 Pharmacology, University of Bath, UK [8], by addressable laser bead immunoassay (ALBIA) in France  
6 at the Department of Immunology, Rouen University Hospital, FR [9].

7

## 8 HLA Modelling

9 Molecular graphics images were produced using the UCSF Chimera package (v1.10.1) from the  
10 Computer Graphics Laboratory, University of California, San Francisco (supported by NIH P41 RR-  
11 01081).

12

## 13 References

14 1 Betteridge Z, Gunawardena H, North J, *et al.* Identification of a novel autoantibody directed  
15 against small ubiquitin-like modifier activating enzyme in dermatomyositis. *Arthritis Rheum*  
16 2007;**56**:3132–7.

17 2 Targoff IN, Mamyrova G, Trieu EP, *et al.* A novel autoantibody to a 155-kd protein is  
18 associated with dermatomyositis. *Arthritis Rheum* 2006;**54**:3682–9.

19 3 Nakashima R, Imura Y, Kobayashi S, *et al.* The RIG-I-like receptor IFIH1/MDA5 is a  
20 dermatomyositis-specific autoantigen identified by the anti-CADM-140 antibody.  
21 *Rheumatology* 2010;**49**:433–40.

22 4 Betteridge Z, Chinoy H, New P, *et al.* Validation of Commercial Myositis Line Blots. In: *Global*  
23 *Conference on Myositis*. Washington: 2017. 14.

24 5 Lloyd TE, Christopher-Stine L, Pinal-Fernandez I, *et al.* Cytosolic 5'-Nucleotidase 1A As a  
25 Target of Circulating Autoantibodies in Autoimmune Diseases. *Arthritis Care Res (Hoboken)*  
26 2016;**68**:66–71.

27 6 Lilleker JB, Rietveld A, Pye SR, *et al.* Cytosolic 5'-nucleotidase 1A autoantibody profile and  
28 clinical characteristics in inclusion body myositis. *Ann Rheum Dis* 2017;**76**:862–8.

29 7 Mammen AL, Chung T, Christopher-Stine L, *et al.* Autoantibodies against 3-hydroxy-3-  
30 methylglutaryl-coenzyme a reductase in patients with statin-associated autoimmune  
31 myopathy. *Arthritis Rheum*. 2011;**63**:713–21.

- 1 8 Tansley SL, Betteridge ZE, Simou SS, *et al.* Anti-HMGCR autoantibodies in juvenile idiopathic  
2 inflammatory myopathies identify a rare but clinically important subset of patients. *J*  
3 *Rheumatol* 2017;**44**:488–92.
- 4 9 Allenbach Y, Drouot L, Rigolet A, *et al.* Anti-HMGCR Autoantibodies in European Patients With  
5 Autoimmune Necrotizing Myopathies. *Medicine (Baltimore)* 2014;**93**:150–7.
- 6
- 7

## 1 **Supplementary Acknowledgments**

2 Study investigators of the Myositis Genetics Consortium, in addition to the authors of this article, are  
3 as follows: Professor Tsuneyo Mimori (Kyoto University), Drs. Chris Amos (Dartmouth College,  
4 Hanover, NH, United States), Christopher Denton (Royal Free Hospital, London, UK), Herman Mann  
5 (Institute of Rheumatology, Prague), David Hilton-Jones (John Radcliffe Hospital, Oxford, UK), Patrick  
6 Kiely (St. George's Hospital, London, UK), Paul H. Plotz, Mark Gourley (National Institute of Arthritis  
7 and Musculoskeletal and Skin Diseases, National Institutes of Health, Bethesda, MD), Kelly Rouster-  
8 Stevens (Emory University School of Medicine, Atlanta, GA), Adam M Huber (Dalhousie University,  
9 Halifax, Nova Scotia, Canada), Galina Marder (North Shore University Hospital, Great Neck, NY),  
10 Mazen Dimachkie and Richard J. Barohn (University of Kansas Medical Center, Kansas City, KS).  
11 Susan Nielsen (Paediatric Rheumatology Unit, Rigshospitalet, Copenhagen, Denmark), Troels Herlin  
12 (Paediatric Rheumatology Clinic, Aarhus University Hospital, Skejby, Denmark), Tina Friis  
13 (Department of Clinical Biochemistry and Immunology, Statens Serum Institute, Copenhagen,  
14 Demark).

15 SweMyoNet: Maryam Dastmalchi, Karolinska University Hospital, Stockholm, Maria Lidén, Uppsala  
16 University, Awat Jalal, Örebro University, Helena Hellström, Rheumatology Clinic Falun, Thomas  
17 Skogh, Linköping University, Aladdin Mohammad, Lund University.

## 18 Shared ImmunoChip Control Cohorts

19 We thank the Rheumatoid Arthritis Consortium International (RACI) for Netherlands, Spanish,  
20 Swedish, UK and US ImmunoChip control genotypes. This study makes use of data generated by the  
21 Wellcome Trust Case-Control Consortium. A full list of the investigators who contributed to the  
22 generation of the data is available from [www.wtccc.org.uk](http://www.wtccc.org.uk). Funding for the project was provided by  
23 the Wellcome Trust under award 076113 and 085475. Swedish control data was provided from EIRA  
24 study, Professor Lars Alfredsson, Department of Environmental Medicine, Karolinska Institutet,

1 Stockholm, Sweden. Control data from the Netherlands was provided from the department of  
2 Rheumatology, Leiden University Medical Center, Leiden, The Netherlands.

3 Polish control data was provided by the Celiac Disease Consortium and Hungarian control data  
4 collected with the help of the Hungarian Research Fund (OTKA) grant K101788 was provided by Prof  
5 Ilma.Korponay-Szabo, Celiac Disease Centre, Heim Pál Children's Hospital, Budapest and University  
6 of Debrecen, Debrecen Hungary.

7 We acknowledge the International MS Genetics Consortium for providing access to control sample  
8 data from Belgium, France, Norway, Italy and Germany. The collection and genotyping of these  
9 samples was made possible by: the Norwegian MS society and the Norwegian Bone Marrow Registry  
10 (Norwegian samples); the French Biological Resource Center for MS Genetics, Genethon and INSERM  
11 (French samples); and a FISM (Italian Foundation for Multiple Sclerosis) grant (“Progetto Speciale  
12 Immunochip”) for Italian samples.

13 Italian samples were collected by Prof. Sandra D'Alfonso (Interdisciplinary Research Center of  
14 Autoimmune Diseases IRCAD, University of Eastern Piedmont, Novara, Italy; PROGEMUS  
15 Consortium) and Dr. Martinelli Boneschi (Laboratory of Genetics of Complex Neurological Disorders,  
16 Division of Neuroscience & INSPE, San Raffaele Scientific Institute, Milan, Italy; PROGRESSO  
17 Consortium); funding was provided by a FISM (Italian Foundation for Multiple Sclerosis) grant  
18 (“Progetto Speciale Immunochip). The KORA study was initiated and financed by the Helmholtz  
19 Zentrum München – German Research Center for Environmental Health, which is funded by the  
20 German Federal Ministry of Education and Research (BMBF) and by the State of Bavaria.  
21 Furthermore, KORA research was supported within the Munich Center of Health Sciences (MC-  
22 Health), Ludwig-Maximilians-Universität, as part of LMUinnovativ.

23

24



1 UK Adult Onset Myositis Immunogenetic Collaboration (UKMYONET)

2 Members of the UK Adult Onset Myositis Immunogenetic Collaboration who recruited and enrolled  
3 subjects are as follows: Drs. Yasmeen Ahmed (Llandudno General Hospital), Raymond Armstrong  
4 (Southampton General Hospital), Robert Bernstein (Manchester Royal Infirmary), Carol Black (Royal  
5 Free Hospital, London), Simon Bowman (University Hospital, Birmingham), Ian Bruce (Manchester  
6 Royal Infirmary), Robin Butler (Robert Jones & Agnes Hunt Orthopaedic Hospital, Oswestry), John  
7 Carty (Lincoln County Hospital), Chandra Chattopadhyay (Wrightington Hospital), Easwaradhas  
8 Chelliah (Wrightington Hospital), Fiona Clarke (James Cook University Hospital, Middlesborough),  
9 Peter Dawes (Staffordshire Rheumatology Centre, Stoke on Trent), Joseph Devlin (Pinderfields  
10 General Hospital, Wakefield), Christopher Edwards (Southampton General Hospital), Paul Emery  
11 (Academic Unit of Musculoskeletal Disease, Leeds), John Fordham (South Cleveland Hospital,  
12 Middlesborough), Alexander Fraser (Academic Unit of Musculoskeletal Disease, Leeds), Hill Gaston  
13 (Addenbrooke's Hospital, Cambridge), Patrick Gordon (King's College Hospital, London), Bridget  
14 Griffiths (Freeman Hospital, Newcastle), Harsha Gunawardena (Frenchay Hospital, Bristol), Frances  
15 Hall (Addenbrooke's Hospital, Cambridge), Beverley Harrison (North Manchester General Hospital),  
16 Elaine Hay (Staffordshire Rheumatology Centre, Stoke on Trent), Lesley Horden (Dewsbury District  
17 General Hospital), John Isaacs (Freeman Hospital, Newcastle), Adrian Jones (Nottingham University  
18 Hospital), Sanjeet Kamath (Staffordshire Rheumatology Centre, Stoke on Trent), Thomas Kennedy  
19 (Royal Liverpool Hospital), George Kitas (Dudley Group Hospitals Trust, Birmingham), Peter Klimiuk  
20 (Royal Oldham Hospital), Sally Knights (Yeovil District Hospital, Somerset), John Lambert (Doncaster  
21 Royal Infirmary), Peter Lanyon (Queen's Medical Centre, Nottingham), Ramasharan Laxminarayan  
22 (Queen's Hospital, Burton Upon Trent), Bryan Lecky (Walton Neuroscience Centre, Liverpool),  
23 Raashid Luqmani (Nuffield Orthopaedic Centre, Oxford), Jeffrey Marks (Steeping Hill Hospital,  
24 Stockport), Michael Martin (St. James University Hospital, Leeds), Dennis McGonagle (Academic Unit  
25 of Musculoskeletal Disease, Leeds), Neil McHugh (Royal National Hospital for Rheumatic Diseases,  
26 Bath), Francis McKenna (Trafford General Hospital, Manchester), John McLaren (Cameron Hospital,

1 Fife), Michael McMahon (Dumfries & Galloway Royal Infirmary, Dumfries), Euan McRorie (Western  
2 General Hospital, Edinburgh), Peter Merry (Norfolk & Norwich University Hospital, Norwich), Sarah  
3 Miles (Dewsbury & District General Hospital, Dewsbury), James Miller (Royal Victoria Hospital,  
4 Newcastle), Anne Nicholls (West Suffolk Hospital, Bury St. Edmunds), Jennifer Nixon (Countess of  
5 Chester Hospital, Chester), Voon Ong (Royal Free Hospital, London), Katherine Over (Countess of  
6 Chester Hospital, Chester), John Packham (Staffordshire Rheumatology Centre, Stoke on Trent),  
7 Nicolo Pipitone (King's College Hospital, London), Michael Plant (South Cleveland Hospital,  
8 Middlesbrough), Gillian Pountain (Hinchingsbrooke Hospital, Huntington), Thomas Pullar (Ninewells  
9 Hospital, Dundee), Mark Roberts (Salford Royal Foundation Trust), Paul Sanders (Wythenshawe  
10 Hospital, Manchester), David Scott (King's College Hospital, London), David Scott (Norfolk & Norwich  
11 University Hospital, Norwich), Michael Shadforth (Staffordshire Rheumatology Centre, Stoke on  
12 Trent), Thomas Sheeran (Cannock Chase Hospital, Cannock, Staffordshire), Arul Srinivasan  
13 (Broomfield Hospital, Chelmsford), David Swinson (Wrightington Hospital), Lee-Suan Teh (Royal  
14 Blackburn Hospital, Blackburn), Michael Webley (Stoke Manderville Hospital, Aylesbury), Brian  
15 Williams (University Hospital of Wales, Cardiff), and Jonathan Winer (Queen Elizabeth Hospital,  
16 Birmingham).

17 UK Juvenile Dermatomyositis Research Group

18 The Juvenile Dermatomyositis Research Group would like to thank all of the patients and their  
19 families who contributed to the Juvenile Dermatomyositis Cohort & Biomarker Study & Repository.  
20 We thank all local research coordinators and principal investigators who have made this research  
21 possible. The JDRG members were as follows:

22 Dr Kate Armon, Mr Joe Ellis-Gage, Ms Holly Roper, Ms Vanja Briggs and Ms Joanna Watts (Norfolk  
23 and Norwich University Hospitals), Dr Liza McCann, Mr Ian Roberts, Dr Eileen Baildam, Ms Louise  
24 Hanna, Ms Olivia Lloyd, Susan Wadeson and Michelle Andrews (The Royal Liverpool Children's  
25 Hospital, Alder Hey, Liverpool), Dr Phil Riley, Ms Ann McGovern, Verna Cuthbert (Royal Manchester

1 Children’s Hospital, Manchester), Dr Clive Ryder, Mrs. Janis Scott, Mrs. Beverley Thomas, Professor  
2 Taunton Southwood, Dr Eslam Al-Abadi and Ruth Howman (Birmingham Children’s Hospital,  
3 Birmingham), Dr Sue Wyatt, Mrs Gillian Jackson, Dr Mark Wood, Dr Tania Amin, Dr Vanessa  
4 VanRooyen and Ms Deborah Burton, Louise Turner & Sarah Hanson (Leeds General Infirmary, Leeds),  
5 Dr Joyce Davidson, Dr Janet Gardner-Medwin, Dr Neil Martin, Ms Sue Ferguson, Ms Liz Waxman and  
6 Mr Michael Browne, Ms Roisin Boyle, Ms Emily Blyth (The Royal Hospital for Sick Children, Yorkhill,  
7 Glasgow), Dr Mark Friswell, Professor Helen Foster, Mrs Alison Swift, Dr Sharmila Jandial, Ms Vicky  
8 Stevenson, Ms Debbie Wade, Dr Ethan Sen, Dr Eve Smith, Ms Lisa Qiao, Mr Stuart Watson and Ms  
9 Claire Duong (Great North Children’s Hospital, Newcastle), Dr Helen Venning, Dr Rangaraj Satyapal,  
10 Mrs Elizabeth Stretton, Ms Mary Jordan, Dr Ellen Mosley, Ms Anna Frost, Ms Lindsay Crate, Dr  
11 Kishore Warriar, Stefanie Stafford, Kelly Sandhu & Tracey Dandy (Queens Medical Centre,  
12 Nottingham), Professor Lucy Wedderburn, Dr Clarissa Pilkington, Dr Nathan Hasson, Dr Muthana Al-  
13 Obadi, Dr Giulia Varnier, Dr Sandrine Lacassagne, Mrs Sue Maillard, Mrs Lauren Stone, Ms Elizabeth  
14 Halkon, Ms Virginia Brown, Ms Audrey Juggins, Dr Sally Smith, Mrs Sian Lunt, Ms Elli Enayat, Mrs  
15 Hemlata Varsani, Miss Laura Kassoumeri, Miss Laura Beard, Miss Katie Arnold, Mrs Yvonne Glackin,  
16 Ms Stephanie Simou, Dr Beverley Almeida, Dr Kiran Nistala, Dr Raquel Marques, Dr Claire Deakin, Dr  
17 Parichat Khaosut, Ms Stefanie Dowle, Dr Charalampia Papadopoulou, Dr Shireena Yasin, Dr Christina  
18 Boros, Dr Meredyth Wilkinson, Dr Chris Piper, Mrs Cerise Johnson-Moore, Ms Lucy Marshall, Ms  
19 Emily Robinson (Great Ormond Street Hospital, London), Dr Kevin Murray (Princess Margaret  
20 Hospital, Perth, Western Australia) Dr John Ioannou and Ms Linda Suffield (University College  
21 London Hospital, London) Ms Helen Lee, Ms Sam Leach, Ms Helen Smith, Dr Anne-Marie McMahon,  
22 Ms Heather Chisem, Jeanette Hall, Ruth Kingshott and Maxine Mutten (Sheffield’s Children’s  
23 Hospital, Sheffield); Dr Nick Wilkinson, Ms Emma Inness, Ms Eunice Kendall, Mr David Mayers, Ruth  
24 Etherton, Danielle Miller and Dr Kathryn Bailey (Oxford University Hospitals, Oxford); Dr Jacqui  
25 Clinch, Ms Natalie Fineman and Ms Helen Pluess-Hall and Suzanne Sketchley (Bristol Royal Hospital  
26 for Children, Bristol); Dr Joyce Davidson, Margaret Connon and Ms Lindsay Vallance (Royal Aberdeen

1 Children's Hospital); Dr Kirsty Haslam, Charlene Bass-Woodcock, Trudy Booth and Ms Louise Akeroyd  
2 (Bradford Teaching Hospitals); Dr Alice Leahy, Amy Collier, Rebecca Cutts, Emma Macleod, Dr Hans  
3 De Graaf, Dr Brian Davidson, Sarah Hartfree, Danny Pratt, Elizabeth Fofana and Lorena Caruana  
4 (University Hospital Southampton) and all the Children, Young people and their families who have  
5 contributed to this research.

6 US Childhood Myositis Heterogeneity Study Group

7 The following members of the US Childhood Myositis Heterogeneity Study Group contributed to this  
8 study: Drs. Barbara S. Adams (University of Michigan, Ann Arbor, MI), Catherine A. Bingham  
9 (Hershey Medical Center, Hershey, PA), Gail D. Cawkwell (All Children's Hospital, St. Petersburg, FL),  
10 Terri H. Finkel (Children's Hospital of Philadelphia, Philadelphia, PA), Steven W. George (Ellicott City,  
11 MD), Harry L. Gewanter (Richmond, VA), Ellen A. Goldmuntz (Children's National Medical Center,  
12 Washington, DC), Donald P. Goldsmith (St. Christopher's Hospital for Children, Philadelphia, PA),  
13 Michael Henrickson (Children's Hospital, Madera, CA), Lisa Imundo (Columbia University, New York,  
14 NY), Ildy M. Katona (Uniformed Services University, Bethesda, MD), Carol B. Lindsley (University of  
15 Kansas, Kansas City), Chester P. Oddis (University of Pittsburgh, Pittsburgh, PA), Judyann C. Olson  
16 (Medical College of Wisconsin, Milwaukee), David Sherry (Children's Hospital of Philadelphia,  
17 Philadelphia, PA), Scott A. Vogelgesang (Walter Reed Army Medical Center, Washington, DC), Carol  
18 A. Wallace (Children's Medical Center, Seattle, WA), Patience H. White (George Washington  
19 University, Washington, DC), and Lawrence S. Zemel (Connecticut Children's Hospital, Hartford).

20

21
